# Supplementary material for: A microcosm approach highlights the response of soil mineral weathering bacterial communities to an increase of K and Mg availability
Source: PubMed Central journal article supplement (PMC6779897; doi:10.1038/s41598-019-50730-y), 2019-10-07
Supplement: 41598_2019_50730_MOESM1_ESM.pdf [file 41598_2019_50730_MOESM1_ESM.pdf]

## *Supplementary files*

### **A microcosm approach highlights the response of soil mineral weathering bacterial communities to an increase of K and Mg availability**

**AUTHORS:** Nicolitch, O.<sup>1,2</sup>, Feucherolles, M.<sup>1</sup>, Churin, J-L.<sup>1</sup>, Fauchery, L.<sup>1</sup>, Turpault, M-P.<sup>2</sup>, and Uroz, S.<sup>1,2\*</sup>

<sup>1</sup>INRA, Université de Lorraine, UMR 1136 “Interactions Arbres Microorganismes”, Centre INRA de Nancy, 54280 Champenoux, France

<sup>2</sup>INRA UR 1138 “Biogéochimie des Ecosystèmes Forestiers”, Centre INRA de Nancy, 54280 Champenoux, France.

**Running title:** Shift in bacterial function depending on nutrient availability

**\* Corresponding author:** Mailing address:

INRA-Université de Lorraine, Interactions Arbres Microorganismes, UMR 1136, 54280 Champenoux, France. Phone: +33 (0)3 83 39 40 81, Fax: +33 (0)3 83 39 40 69. E-mail:

[stephane.uroz@inra.fr](mailto:stephane.uroz@inra.fr).

**Figure S1 : Respiration measures (expressed as CO<sub>2</sub> rate) obtained using the Microresp method on the different treatments (control, K and Mg fertilized) and the four sampling times (T0, T1,T3 and T4).**

Microresp data.

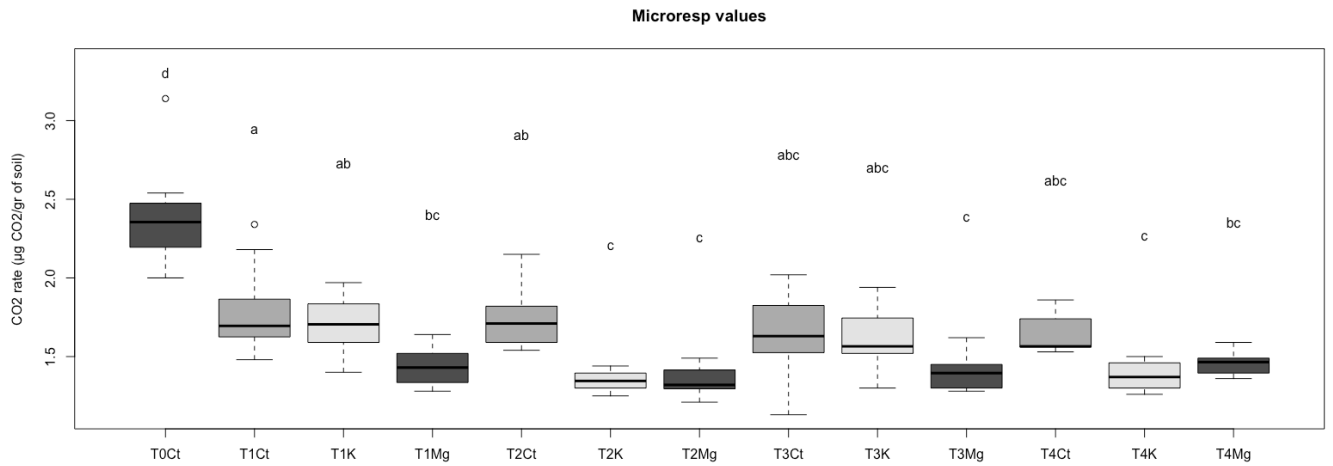

**Figure S2 : Relative distribution of the major bacterial phyla in the different treatments (control, K and Mg fertilized) and the four sampling times (T0, T1,T3 and T4).**

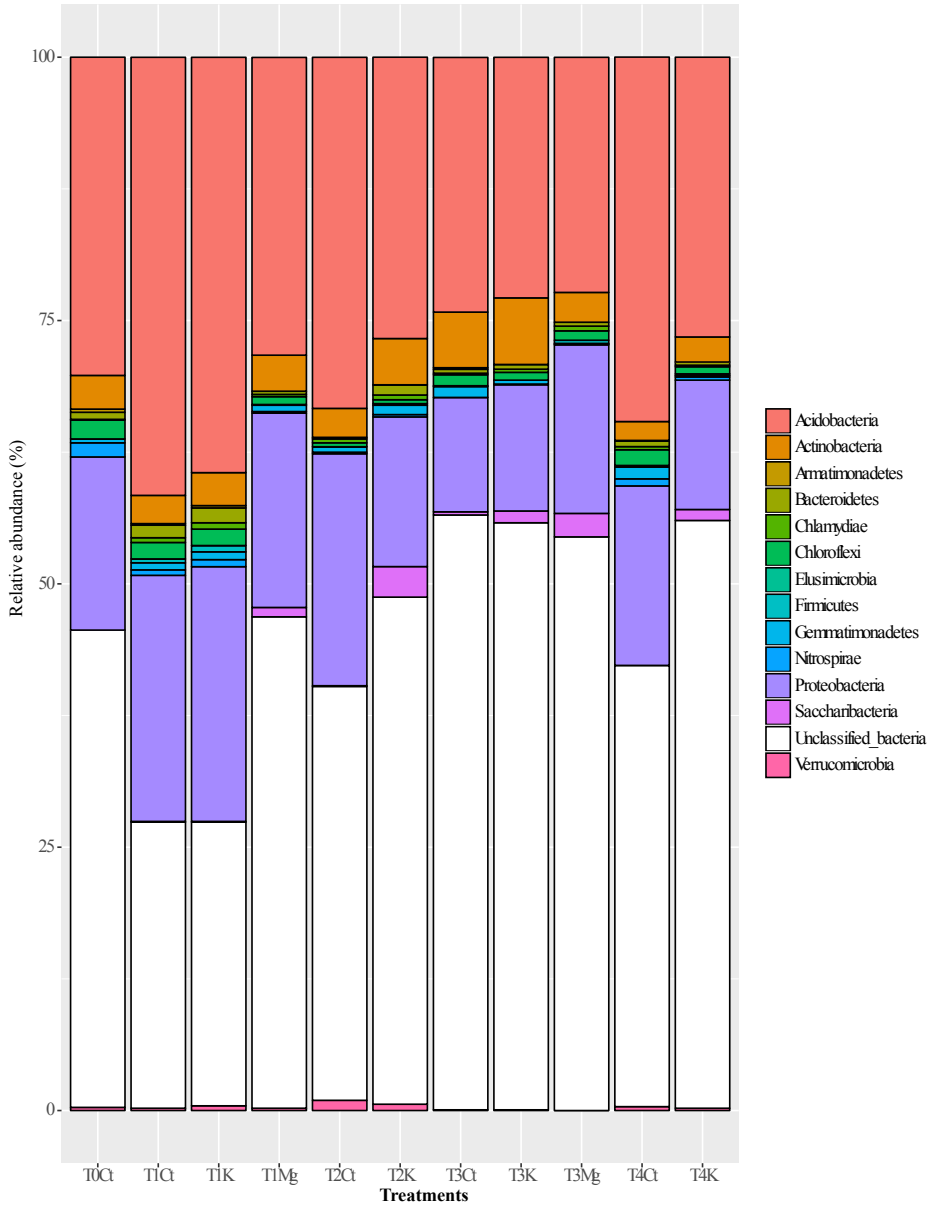

**Table S1 : Catabolic potentials measured using the Biolog Ecoplates.** For each sampling time (T1 to T4), treatments presenting different letters (a,b,c) are significantly different according to a one-factor ANOVA and Tukey post-hoc test ( $P < 0.05$ ). Treatments are presented as follows: Ct, control; Mg, Mg fertilized and K, K fertilized. The P values presenting asterisk(s) were considered as significant after a FDR correction.

| Substrate categories  | T1       |      |             |             | T2           |              |                       |                       |
|-----------------------|----------|------|-------------|-------------|--------------|--------------|-----------------------|-----------------------|
|                       | Polymers | 0.40 | NS          | Ct = K = Mg | a a a        | <b>0.003</b> | **                    | <b>Ct = K &gt; Mg</b> |
| Miscellaneous         | 0.86     | NS   | K = Ct = Mg | a a a       | 0.2          | NS           | Mg = Ct = K           | a a a                 |
| Carbohydrates         | 0.84     | NS   | Ct = K = Mg | a a a       | 0.10         | NS           | Mg = Ct = K           | a a a                 |
| Carboxylic acids      | 0.28     | NS   | Ct = K = Mg | a a a       | <b>0.009</b> | **           | <b>Ct = K &gt; Mg</b> | <b>a a b</b>          |
| Amino acids           | 0.39     | NS   | Ct = K = Mg | a a a       | 0.75         | NS           | Mg = Ct = K           | a a a                 |
| <b>All substrates</b> | 0.64     | NS   | Ct = K = Mg | a a a       | 0.17         | NS           | Mg = Ct = K           | a a a                 |

| Substrate categories  | T3          |              |             |                    | T4            |       |             |             |
|-----------------------|-------------|--------------|-------------|--------------------|---------------|-------|-------------|-------------|
|                       | Polymers    | <b>0.004</b> | **          | <b>Mg ≥ K ≥ Ct</b> | <b>a ab b</b> | 0.025 | NS          | Mg = K = Ct |
| Miscellaneous         | 0.032       | NS           | Mg = Ct = K | a a a              | 0.033         | NS    | Mg = K = Ct | a a a       |
| Carbohydrates         | 0.58        | NS           | Ct = Mg = K | a a a              | 0.34          | NS    | Mg = Ct = K | a a a       |
| Carboxylic acids      | 0.024       | NS           | Ct = K = Mg | a a a              | 0.032         | NS    | Ct = Mg = K | a a a       |
| Amino acids           | 0.5         | NS           | Ct = Mg = K | a a a              | 0.81          | NS    | Mg = Ct = K | a a a       |
| <b>All substrates</b> | <b>0.73</b> | N            | Ct = Mg = K | a a a              | 0.61          | NS    | Mg = Ct = K | a a a       |

**Table S2: Estimates of the taxonomic diversity in bacterial communities.** For each sampling time (T1 to T4), treatments presenting different letters (a,b,c) are significantly different according to a one-factor ANOVA and Tukey post-hoc test ( $P < 0.05$ ). Treatments are presented as follows: Ct, control; Mg, Mg fertilized and K, K fertilized. Each time treatment is presented (T1 to T4) independently or as factor for comparison. Significant differences are presented in bold. Stars indicate significant differences (\*\*\*:  $p < 0.001$ , \*\*:  $p < 0.01$ , \*:  $p < 0.05$ ).

| Time           | Treatment | Coverage       | Sobs            | Simpson           | Shannon        | Chao              |
|----------------|-----------|----------------|-----------------|-------------------|----------------|-------------------|
| <b>T0</b>      | <b>Ct</b> | 0.86 ± 0.02 ab | 114.67 ± 7.22 a | 26.25 ± 4.54 ab   | 3.89 ± 0.12 a  | 227.58 ± 31.81 ab |
|                | <b>Ct</b> | 0.84 ± 0.01 a  | 131 ± 3.51 a    | 45.92 ± 3.18 a    | 4.23 ± 0.02 a  | 269.04 ± 15.04 a  |
| <b>T1</b>      | <b>K</b>  | 0.87 ± 0.01 ab | 121.33 ± 7.26 a | 36.34 ± 1.53 ab   | 4.13 ± 0.07 a  | 216.72 ± 15.06 ab |
|                | <b>Mg</b> | 0.88 ± 0 ab    | 104 ± 11.93 a   | 28.15 ± 8.61 ab   | 3.75 ± 0.32 a  | 193.44 ± 9.72 ab  |
| <b>T2</b>      | <b>Ct</b> | 0.88 ± 0.01 ab | 108 ± 5.13 a    | 28 ± 5.39 ab      | 3.89 ± 0.13 a  | 183.43 ± 16.18 ab |
|                | <b>K</b>  | 0.89 ± 0 b     | 105 ± 1.53 a    | 22.26 ± 3.36 b    | 3.77 ± 0.1 a   | 164.2 ± 4.74 b    |
| <b>T3</b>      | <b>Ct</b> | 0.89 ± 0 b     | 101 ± 2.89 a    | 15.96 ± 2.13 b    | 3.6 ± 0.08 a   | 168.26 ± 9.43 b   |
|                | <b>K</b>  | 0.87 ± 0.01 ab | 106.33 ± 4.33 a | 17.44 ± 5.44 b    | 3.61 ± 0.18 a  | 201.81 ± 7.71 ab  |
| <b>T4</b>      | <b>Mg</b> | 0.89 ± 0.01 b  | 100.33 ± 8.19 a | 16.59 ± 3.02 b    | 3.59 ± 0.16 a  | 159.9 ± 19.92 b   |
|                | <b>Ct</b> | 0.87 ± 0.01 ab | 117.67 ± 3.33 a | 30.04 ± 1.87 ab   | 4.02 ± 0.05 a  | 191.72 ± 20.84 ab |
|                | <b>K</b>  | 0.89 ± 0.02 b  | 99 ± 12.12 a    | 19.41 ± 5.21 b    | 3.59 ± 0.28 a  | 172.93 ± 28.81 b  |
| <b>p-value</b> |           | <b>0.028 *</b> | 0.073           | <b>0.002 **</b>   | 0.09817        | <b>0.011 *</b>    |
| <b>T0</b>      |           | 0.86 ± 0.02 a  | 114.67 ± 7.22 a | 26.25 ± 4.54 ab   | 3.89 ± 0.12 ab | 227.58 ± 31.81 ab |
| <b>T1</b>      |           | 0.86 ± 0.01 a  | 118.78 ± 5.73 a | 36.80 ± 3.72 a    | 4.04 ± 0.12 a  | 226.40 ± 13.06 a  |
| <b>T2</b>      |           | 0.88 ± 0.00 a  | 106.50 ± 2.49 a | 25.13 ± 3.12 ab   | 3.83 ± 0.08 ab | 173.82 ± 8.68 ab  |
| <b>T3</b>      |           | 0.88 ± 0.00 a  | 102.56 ± 2.96 a | 16.66 ± 1.91 b    | 3.60 ± 0.07 b  | 176.66 ± 9.30 b   |
| <b>T4</b>      |           | 0.88 ± 0.01 a  | 108.33 ± 7.00 a | 24.73 ± 3.43 ab   | 3.81 ± 0.16 ab | 182.32 ± 16.45 ab |
| <b>p-value</b> |           | 0.089          | 0.139           | <b>0.0009 ***</b> | 0.06557        | <b>0.014 *</b>    |
|                | <b>Ct</b> | 0.87 ± 0.01 a  | 114.47 ± 3.22 a | 29.23 ± 2.93 a    | 3.93 ± 0.06 a  | 208.01 ± 12.31 a  |
|                | <b>K</b>  | 0.88 ± 0.01 a  | 107.92 ± 4.02 a | 23.86 ± 2.86 a    | 3.78 ± 0.1 a   | 188.92 ± 9.63 a   |
|                | <b>Mg</b> | 0.89 ± 0.01 a  | 102.17 ± 6.52 a | 22.37 ± 4.83 a    | 3.67 ± 0.17 a  | 176.67 ± 12.43 a  |

|                |       |       |       |       |       |
|----------------|-------|-------|-------|-------|-------|
| <b>p-value</b> | 0.134 | 0.163 | 0.311 | 0.210 | 0.231 |
|----------------|-------|-------|-------|-------|-------|

**Table S3. Comparison of the different treatments at each sampling times at the phylum, class, order, family, genus and OTU levels.** The relative distribution of the sequences in the different taxonomic levels considered was analyzed by one-factor ANOVA (and a post-hoc test,  $P < 0.05$ ) and a P value correction using the False-Discovery-Rate procedure. Only the taxa or OTUs represented by a minimum of 100 sequences have been considered. The symbols '>' mean significantly more abundant and '=' not significantly different. Bold indicates significant difference between the different treatments (Ct, control; K, K amended and Mg, Mg amended). The grey color indicates the sampling times for which the three treatments (Ct, +K, +Mg) have been treated. The number of sequences per taxa considered is presented (N seq). The column 'Level' refers to the taxonomic classification provided by Mothur. The taxonomic affiliation of the different OTUs is presented below the table.

| Level | Group              | N seq | T0          | T1            |               |                |                  |                       | T2            |               |                 |                  |
|-------|--------------------|-------|-------------|---------------|---------------|----------------|------------------|-----------------------|---------------|---------------|-----------------|------------------|
|       |                    |       |             | Ct            | K             | Mg             | p-value          | Stats                 | Ct            | K             | p-value         | Stats            |
| 2     | Saccharibacteria   | 109   | 0.07 ± 0.07 | 0 ± 0 a       | 0 ± 0 a       | 0.74 ± 0.41 b  | <b>0.009</b> **  | <b>Mg &gt; Ct = K</b> | 0 ± 0         | 2.83 ± 1.83   | <b>0.048</b> NS | <b>K = Ct</b>    |
| 3     | Betaproteobacteria | 394   | 2.68 ± 0.34 | 5.28 ± 0.64   | 2.9 ± 0.78    | 1.86 ± 0.91    | 0.092 NS         | Ct = K = Mg           | 4.46 ± 0.34 b | 1.34 ± 0.39 a | <b>0.007</b> ** | <b>Ct &gt; K</b> |
| 4     | Burkholderiales    | 301   | 2.23 ± 0.56 | 4.84 ± 0.41   | 2.38 ± 0.73   | 1.04 ± 0.41    | <b>0.014</b> NS  | <b>Ct = K = Mg</b>    | 3.57 ± 0.22 b | 0.67 ± 0.34 a | <b>0.006</b> ** | <b>Ct &gt; K</b> |
| 6     | Luteibacter        | 27    | 0 ± 0       | 0.3 ± 0.07    | 0.22 ± 0.13   | 0.52 ± 0.52    | 0.912 NS         | Mg = Ct = K           | 0 ± 0         | 0 ± 0         | 1.000 NS        | K = Ct           |
| 7     | Otu0001            | 3035  | 12.72 ± 3   | 6.55 ± 0.88 b | 6.55 ± 1.03 a | 11.31 ± 4.92 b | <b>0.005</b> *** | <b>K &gt; Ct = Mg</b> | 11.68 ± 2.84  | 12.28 ± 1.18  | 0.374 NA        | Ct = K           |
| 7     | Otu0002            | 1309  | 7.29 ± 0.71 | 5.28 ± 1.04 b | 7.37 ± 0.46 a | 8.78 ± 2.02 a  | <b>0.01</b> **   | <b>Ct &gt; K = Mg</b> | 6.18 ± 2.31   | 12.8 ± 2.39   | 0.374 NA        | Ct = K           |

| Level | Group              | N seq | T3           |              |               |                 |                       | T4          |             |          |        |
|-------|--------------------|-------|--------------|--------------|---------------|-----------------|-----------------------|-------------|-------------|----------|--------|
|       |                    |       | Ct           | K            | Mg            | p-value         | Stats                 | Ct          | K           | p-value  | Stats  |
| 2     | Saccharibacteria   | 109   | 0.3 ± 0.3    | 1.12 ± 0.56  | 2.31 ± 1.22   | 0.198 NS        | Mg = K = Ct           | 0.07 ± 0.07 | 0.67 ± 0.34 | 0.078 NS | K = Ct |
| 3     | Betaproteobacteria | 394   | 1.86 ± 0.97  | 1.56 ± 0.26  | 2.01 ± 1.01   | 0.967 NS        | Mg = Ct = K           | 3.5 ± 0.54  | 1.86 ± 0.71 | 0.152 NS | Ct = K |
| 4     | Burkholderiales    | 301   | 1.41 ± 0.84  | 1.04 ± 0.2   | 1.41 ± 0.97   | 0.982 NS        | Ct = Mg = K           | 2.75 ± 0.37 | 1.04 ± 0.45 | 0.067 NS | Ct = K |
| 6     | Luteibacter        | 27    | 0 ± 0 a      | 0 ± 0 a      | 0.74 ± 0.27 b | <b>0.002</b> ** | <b>Mg &gt; Ct = K</b> | 0 ± 0       | 0.22 ± 0.22 | 0.374 NS | K = Ct |
| 7     | Otu0001            | 3035  | 20.68 ± 2.19 | 20.61 ± 3.74 | 18.68 ± 4.08  | 1.000 NS        | Mg = K = Ct           | 11.9 ± 1.07 | 18.6 ± 3.65 | 0.374 NA | K = Ct |
| 7     | Otu0002            | 1309  | 7.81 ± 1.1   | 8.04 ± 1.56  | 11.31 ± 1.07  | 0.083 NS        | Ct = K = Mg           | 6.25 ± 0.68 | 7.89 ± 3.42 | 0.374 NA | Ct = K |

## Taxonomic affiliation of the OTUs

| OUT id  | Phylum                | Class                      | Order                      | Family                         | Genus                                       |
|---------|-----------------------|----------------------------|----------------------------|--------------------------------|---------------------------------------------|
| Otu0001 | Unclassified bacteria | -                          | -                          | -                              | -                                           |
| Otu0002 | Unclassified bacteria | -                          | -                          | -                              | -                                           |
| Otu0003 | Acidobacteria         | Subgroup_2                 | Subgroup_2_or              | Subgroup_2_fa                  | Subgroup_2_ge                               |
| Otu0004 | Unclassified bacteria | -                          | -                          | -                              | -                                           |
| Otu0005 | Acidobacteria         | Subgroup_2                 | Subgroup_2_or              | Subgroup_2_fa                  | Subgroup_2_ge                               |
| Otu0006 | Unclassified bacteria | -                          | -                          | -                              | -                                           |
| Otu0007 | Acidobacteria         | Acidobacteria              | Acidobacteriales           | Acidobacteriaceae_(Subgroup_1) | Acidobacteriaceae_(Subgroup_1)_unclassified |
| Otu0035 | Acidobacteria         | Acidobacteria              | Acidobacteriales           | Acidobacteriaceae_(Subgroup_1) | Acidobacteriaceae_(Subgroup_1)_unclassified |
| Otu0054 | Acidobacteria         | Acidobacteria_unclassified | Acidobacteria_unclassified | Acidobacteria_unclassified     | Acidobacteria_unclassified                  |
| Otu0068 | Proteobacteria        | Alphaproteobacteria        | Rhodospirillales           | Rhodospirillales_unclassified  | Rhodospirillales_unclassified               |

**Table S4: Comparison of the 16S rRNA sequences from the bacterial collection with the amplicon pyrosequencing dataset.** For each OTU the percentage of identity with culturable representative of our study is presented as well as the taxonomic affiliation. OTU presenting a strong homology with bacterial strains are presented in bold.

| OTU            | Number of sequences | Identity (%) | Phylum                | Class                        | Order                                  | Family                                 | Genus                                       |
|----------------|---------------------|--------------|-----------------------|------------------------------|----------------------------------------|----------------------------------------|---------------------------------------------|
| Otu0001        | 2037                | < 90         | Bacteria_unclassified | Bacteria_unclassified        | Bacteria_unclassified                  | Bacteria_unclassified                  | Bacteria_unclassified                       |
| Otu0002        | 1196                | < 90         | Bacteria_unclassified | Bacteria_unclassified        | Bacteria_unclassified                  | Bacteria_unclassified                  | Bacteria_unclassified                       |
| Otu0003        | 781                 | < 90         | Acidobacteria         | Subgroup_2                   | Subgroup_2_or                          | Subgroup_2_fa                          | Subgroup_2_ge                               |
| Otu0004        | 779                 | < 90         | Bacteria_unclassified | Bacteria_unclassified        | Bacteria_unclassified                  | Bacteria_unclassified                  | Bacteria_unclassified                       |
| Otu0005        | 649                 | < 90         | Bacteria_unclassified | Bacteria_unclassified        | Bacteria_unclassified                  | Bacteria_unclassified                  | Bacteria_unclassified                       |
| Otu0006        | 387                 | < 90         | Acidobacteria         | Subgroup_2                   | Subgroup_2_or                          | Subgroup_2_fa                          | Subgroup_2_ge                               |
| Otu0007        | 313                 | < 90         | Acidobacteria         | Subgroup_2                   | Subgroup_2_or                          | Subgroup_2_fa                          | Subgroup_2_ge                               |
| Otu0008        | 307                 | < 90         | Acidobacteria         | Subgroup_2                   | Subgroup_2_or                          | Subgroup_2_fa                          | Subgroup_2_ge                               |
| Otu0009        | 281                 | < 90         | Bacteria_unclassified | Bacteria_unclassified        | Bacteria_unclassified                  | Bacteria_unclassified                  | Bacteria_unclassified                       |
| Otu0010        | 280                 | < 90         | Acidobacteria         | Acidobacteria                | Acidobacteriales                       | Acidobacteriaceae_(Subgroup_1)         | Acidobacteriaceae_(Subgroup_1)_unclassified |
| Otu0013        | 186                 | 95.4         | Actinobacteria        | <b>Actinobacteria</b>        | <b>Frankiales</b>                      | <b>Acidothermaceae</b>                 | Acidothermus                                |
| <b>Otu0014</b> | <b>170</b>          | <b>99.1</b>  | <b>Proteobacteria</b> | <b>Betaproteobacteria</b>    | <b>Burkholderiales</b>                 | <b>Burkholderiaceae</b>                | <b>Burkholderia-Paraburkholderia</b>        |
| <b>Otu0019</b> | <b>158</b>          | <b>100</b>   | <b>Proteobacteria</b> | <b>Gammaproteobacteria</b>   | <b>Xanthomonadales</b>                 | <b>Xanthomonadaceae</b>                | <b>Xanthomonadaceae_unclassified</b>        |
| Otu0049        | 40                  | 92.3         | Proteobacteria        | <b>Alphaproteobacteria</b>   | <b>Rhizobiales</b>                     | <b>Rhizobiales_Incertae_Sedis</b>      | Rhizomicrobium                              |
| <b>Otu0055</b> | <b>37</b>           | <b>100</b>   | <b>Proteobacteria</b> | <b>Betaproteobacteria</b>    | <b>Burkholderiales</b>                 | <b>Oxalobacteraceae</b>                | <b>Oxalobacteraceae_unclassified</b>        |
| Otu0059        | 35                  | 90.7         | Proteobacteria        | <b>Gammaproteobacteria</b>   | <b>Xanthomonadales</b>                 | <b>Xanthomonadaceae</b>                | Xanthomonadaceae_unclassified               |
| Otu0064        | 32                  | 89.5         | Proteobacteria        | <b>Alphaproteobacteria</b>   | <b>Rhizobiales</b>                     | <b>Xanthobacteraceae</b>               | Variibacter                                 |
| Otu0081        | 22                  | 89.6         | Proteobacteria        | <b>Alphaproteobacteria</b>   | <b>Rhizobiales</b>                     | <b>Rhizobiales_unclassified</b>        | Rhizobiales_unclassified                    |
| Otu0089        | 20                  | 93.6         | Actinobacteria        | <b>Actinobacteria</b>        | <b>Streptomycetales</b>                | <b>Streptomycetaceae</b>               | Streptacidiphilus                           |
| <b>Otu0090</b> | <b>20</b>           | <b>99</b>    | <b>Proteobacteria</b> | <b>Betaproteobacteria</b>    | <b>Burkholderiales</b>                 | <b>Burkholderiaceae</b>                | <b>Burkholderia-Paraburkholderia</b>        |
| Otu0096        | 18                  | 92.5         | Proteobacteria        | <b>Betaproteobacteria</b>    | <b>Betaproteobacteria_unclassified</b> | <b>Betaproteobacteria_unclassified</b> | <b>Betaproteobacteria_unclassified</b>      |
| <b>Otu0101</b> | <b>17</b>           | <b>100</b>   | <b>Actinobacteria</b> | <b>Actinobacteria</b>        | <b>Micrococcales</b>                   | <b>Micrococcaceae</b>                  | <b>Micrococcaceae_unclassified</b>          |
| Otu0105        | 17                  | 93.8         | Actinobacteria        | <b>Acidimicrobia</b>         | <b>Acidimicrobiales</b>                | uncultured                             | uncultured_ge                               |
| <b>Otu0108</b> | <b>16</b>           | <b>99.1</b>  | <b>Proteobacteria</b> | <b>Betaproteobacteria</b>    | <b>Burkholderiales</b>                 | <b>Burkholderiaceae</b>                | <b>Cupriavidus</b>                          |
| Otu0110        | 16                  | 94.6         | Proteobacteria        | <b>Betaproteobacteria</b>    | <b>Burkholderiales</b>                 | <b>Comamonadaceae</b>                  | <b>Comamonadaceae_unclassified</b>          |
| Otu0113        | 16                  | 89.5         | Bacteroidetes         | <b>Sphingobacteriia</b>      | <b>Sphingobacteriales</b>              | <b>Chitinophagaceae</b>                | <b>Chitinophagaceae_unclassified</b>        |
| Otu0115        | 15                  | 92.5         | Proteobacteria        | <b>Betaproteobacteria</b>    | <b>Betaproteobacteria_unclassified</b> | <b>Betaproteobacteria_unclassified</b> | <b>Betaproteobacteria_unclassified</b>      |
| Otu0117        | 15                  | 92.7         | Proteobacteria        | <b>Gammaproteobacteria</b>   | <b>Xanthomonadales</b>                 | <b>Xanthomonadaceae</b>                | <b>Dokdonella</b>                           |
| <b>Otu0120</b> | <b>14</b>           | <b>100</b>   | <b>Proteobacteria</b> | <b>Betaproteobacteria</b>    | <b>Burkholderiales</b>                 | <b>Oxalobacteraceae</b>                | <b>Collimonas</b>                           |
| <b>Otu0124</b> | <b>13</b>           | <b>99.1</b>  | <b>Proteobacteria</b> | <b>Betaproteobacteria</b>    | <b>Burkholderiales</b>                 | <b>Oxalobacteraceae</b>                | <b>Oxalobacteraceae_unclassified</b>        |
| Otu0127        | 12                  | 96.2         | Proteobacteria        | <b>Betaproteobacteria</b>    | <b>Nitrosomonadales</b>                | <b>Nitrosomonadaceae</b>               | <b>Nitrospira</b>                           |
| Otu0130        | 12                  | 91.8         | Bacteria_unclassified | <b>Bacteria_unclassified</b> | <b>Bacteria_unclassified</b>           | <b>Bacteria_unclassified</b>           | <b>Bacteria_unclassified</b>                |
| Otu0133        | 12                  | 89.8         | Proteobacteria        | <b>Gammaproteobacteria</b>   | <b>Xanthomonadales</b>                 | <b>Xanthomonadaceae</b>                | <b>Xanthomonadaceae_unclassified</b>        |



|                |           |             |                              |                              |                                  |                                  |                                       |
|----------------|-----------|-------------|------------------------------|------------------------------|----------------------------------|----------------------------------|---------------------------------------|
| <b>Otu0144</b> | <b>10</b> | <b>100</b>  | <b>Proteobacteria</b>        | <b>Gammaproteobacteria</b>   | <b>Xanthomonadales</b>           | <b>Xanthomonadaceae</b>          | <b>Xanthomonadaceae_unclassified</b>  |
| Otu0150        | 10        | 91.3        | Proteobacteria               | Alphaproteobacteria          | Rhizobiales                      | Roseiarcaceae                    | Roseiarcus                            |
| Otu0158        | 9         | 93.5        | Actinobacteria               | Actinobacteria               | Actinobacteria_unclassified      | Actinobacteria_unclassified      | Actinobacteria_unclassified           |
| <b>Otu0164</b> | <b>9</b>  | <b>98.1</b> | <b>Proteobacteria</b>        | <b>Betaproteobacteria</b>    | <b>Burkholderiales</b>           | <b>Burkholderiaceae</b>          | <b>Burkholderia-Paraburkholderia</b>  |
| Otu0165        | 9         | 91.3        | Proteobacteria               | Alphaproteobacteria          | Rhizobiales                      | Xanthobacteraceae                | uncultured                            |
| Otu0167        | 9         | 91.7        | Actinobacteria               | Actinobacteria               | Actinobacteria_unclassified      | Actinobacteria_unclassified      | Actinobacteria_unclassified           |
| Otu0168        | 8         | 92.3        | Bacteroidetes                | Sphingobacteriia             | Sphingobacteriales               | Sphingobacteriaceae              | Mucilaginibacter                      |
| <b>Otu0192</b> | <b>7</b>  | <b>98.1</b> | <b>Proteobacteria</b>        | <b>Betaproteobacteria</b>    | <b>Burkholderiales</b>           | <b>Oxalobacteraceae</b>          | <b>Oxalobacteraceae_unclassified</b>  |
| Otu0193        | 6         | 91.3        | Proteobacteria               | Alphaproteobacteria          | Rhizobiales                      | Rhizobiales_unclassified         | Rhizobiales_unclassified              |
| Otu0194        | 6         | 92.2        | Proteobacteria               | Alphaproteobacteria          | Rhizobiales                      | Xanthobacteraceae                | uncultured                            |
| Otu0199        | 6         | 91.3        | Proteobacteria               | Alphaproteobacteria          | Alphaproteobacteria_unclassified | Alphaproteobacteria_unclassified | Alphaproteobacteria_unclassified      |
| Otu0208        | 6         | 91.4        | Proteobacteria               | Alphaproteobacteria          | Rhizobiales                      | Bradyrhizobiaceae                | Bradyrhizobiaceae_unclassified        |
| <b>Otu0212</b> | <b>6</b>  | <b>99</b>   | <b>Proteobacteria</b>        | <b>Gammaproteobacteria</b>   | <b>Xanthomonadales</b>           | <b>Xanthomonadaceae</b>          | <b>Xanthomonadaceae_unclassified</b>  |
| Otu0213        | 6         | 91.7        | Actinobacteria               | Actinobacteria               | Actinobacteria_unclassified      | Actinobacteria_unclassified      | Actinobacteria_unclassified           |
| <b>Otu0226</b> | <b>5</b>  | <b>99</b>   | <b>Proteobacteria</b>        | <b>Betaproteobacteria</b>    | <b>Burkholderiales</b>           | <b>Burkholderiaceae</b>          | <b>Burkholderia-Paraburkholderia</b>  |
| Otu0232        | 5         | 92.6        | Proteobacteria               | Betaproteobacteria           | Burkholderiales                  | Comamonadaceae                   | Aquicola                              |
| Otu0233        | 5         | 90.8        | Actinobacteria               | Actinobacteria               | Actinobacteria_unclassified      | Actinobacteria_unclassified      | Actinobacteria_unclassified           |
| Otu0239        | 5         | 95.2        | Bacteria_unclassified        | Bacteria_unclassified        | Bacteria_unclassified            | Bacteria_unclassified            | Bacteria_unclassified                 |
| <b>Otu0243</b> | <b>5</b>  | <b>99.1</b> | <b>Actinobacteria</b>        | <b>Actinobacteria</b>        | <b>Streptomycetales</b>          | <b>Streptomycetaceae</b>         | <b>Streptomycetaceae_unclassified</b> |
| Otu0245        | 5         | 91.6        | Proteobacteria               | Betaproteobacteria           | Betaproteobacteria_unclassified  | Betaproteobacteria_unclassified  | Betaproteobacteria_unclassified       |
| Otu0261        | 4         | 89.8        | Proteobacteria               | Gammaproteobacteria          | Xanthomonadales                  | Xanthomonadaceae                 | Rhodanobacter                         |
| Otu0264        | 4         | 91.3        | Proteobacteria               | Alphaproteobacteria          | Rhizobiales                      | Xanthobacteraceae                | uncultured                            |
| Otu0269        | 4         | 91.9        | Actinobacteria               | Actinobacteria_unclassified  | Actinobacteria_unclassified      | Actinobacteria_unclassified      | Actinobacteria_unclassified           |
| Otu0272        | 4         | 93.2        | Proteobacteria               | Alphaproteobacteria          | Rhizobiales                      | Rhizobiales_unclassified         | Rhizobiales_unclassified              |
| Otu0279        | 4         | 91.4        | Bacteria_unclassified        | Bacteria_unclassified        | Bacteria_unclassified            | Bacteria_unclassified            | Bacteria_unclassified                 |
| Otu0282        | 4         | 90          | Actinobacteria               | Acidimicrobiia               | Acidimicrobiales                 | uncultured                       | uncultured_ge                         |
| Otu0285        | 4         | 91.7        | Proteobacteria               | Gammaproteobacteria          | Xanthomonadales                  | Xanthomonadaceae                 | Xanthomonadaceae_unclassified         |
| Otu0289        | 4         | 93.6        | Actinobacteria               | Actinobacteria               | Actinobacteria_unclassified      | Actinobacteria_unclassified      | Actinobacteria_unclassified           |
| Otu0295        | 4         | 92.7        | Actinobacteria               | Actinobacteria               | Corynebacteriales                | Nocardiaceae                     | Nocardia                              |
| Otu0299        | 4         | 92.6        | Actinobacteria               | Actinobacteria               | Frankiales                       | Frankiales_unclassified          | Frankiales_unclassified               |
| Otu0302        | 4         | 93.3        | Proteobacteria               | Alphaproteobacteria          | Rhizobiales                      | Rhizobiales_unclassified         | Rhizobiales_unclassified              |
| Otu0316        | 3         | 93.5        | Firmicutes                   | Bacilli                      | Bacillales                       | Paenibacillaceae                 | Cohnella                              |
| <b>Otu0320</b> | <b>3</b>  | <b>99.1</b> | <b>Firmicutes</b>            | <b>Bacilli</b>               | <b>Bacillales</b>                | <b>Bacillaceae</b>               | <b>Bacillus</b>                       |
| <b>Otu0324</b> | <b>3</b>  | <b>97.4</b> | <b>Bacteria_unclassified</b> | <b>Bacteria_unclassified</b> | <b>Bacteria_unclassified</b>     | <b>Bacteria_unclassified</b>     | <b>Bacteria_unclassified</b>          |
| Otu0335        | 3         | 95.4        | Firmicutes                   | Bacilli                      | Lactobacillales                  | Lactobacillaceae                 | Lactobacillus                         |
| Otu0340        | 3         | 89.8        | Actinobacteria               | Acidimicrobiia               | Acidimicrobiales                 | uncultured                       | uncultured_ge                         |
| Otu0357        | 3         | 91.1        | Actinobacteria               | Acidimicrobiia               | Acidimicrobiales                 | uncultured                       | uncultured_ge                         |
| Otu0367        | 3         | 93.8        | Actinobacteria               | Acidimicrobiia               | Acidimicrobiales                 | uncultured                       | uncultured_ge                         |
| Otu0385        | 2         | 91.6        | Proteobacteria               | Betaproteobacteria           | Betaproteobacteria_unclassified  | Betaproteobacteria_unclassified  | Betaproteobacteria_unclassified       |
| <b>Otu0389</b> | <b>2</b>  | <b>98.1</b> | <b>Firmicutes</b>            | <b>Bacilli</b>               | <b>Bacillales</b>                | <b>Paenibacillaceae</b>          | <b>Paenibacillus</b>                  |
| Otu0395        | 2         | 95.4        | Actinobacteria               | Actinobacteria               | Micrococcales                    | Microbacteriaceae                | Microbacteriaceae_unclassified        |

|                |          |             |                              |                              |                                  |                                  |                                       |
|----------------|----------|-------------|------------------------------|------------------------------|----------------------------------|----------------------------------|---------------------------------------|
| Otu0408        | 2        | 93.1        | Proteobacteria               | Alphaproteobacteria          | Rhizobiales                      | Phyllobacteriaceae               | Phyllobacteriaceae_unclassified       |
| <b>Otu0414</b> | <b>2</b> | <b>98.1</b> | <b>Bacteroidetes</b>         | <b>Sphingobacteriia</b>      | <b>Sphingobacteriales</b>        | <b>Sphingobacteriaceae</b>       | <b>Pedobacter</b>                     |
| <b>Otu0420</b> | <b>2</b> | <b>98.2</b> | <b>Actinobacteria</b>        | <b>Actinobacteria</b>        | <b>Streptomycetales</b>          | <b>Streptomycetaceae</b>         | <b>Streptomycetaceae_unclassified</b> |
| Otu0426        | 2        | 95.3        | Firmicutes                   | Bacilli                      | Bacillales                       | Paenibacillaceae                 | Paenibacillaceae_unclassified         |
| Otu0430        | 2        | 90.2        | Proteobacteria               | Alphaproteobacteria          | Rhizobiales                      | Hyphomicrobiaceae                | Hyphomicrobiaceae_unclassified        |
| Otu0438        | 2        | 91.3        | Proteobacteria               | Alphaproteobacteria          | Rhizobiales                      | Rhizobiales_unclassified         | Rhizobiales_unclassified              |
| <b>Otu0449</b> | <b>2</b> | <b>97.2</b> | <b>Firmicutes</b>            | <b>Bacilli</b>               | <b>Bacillales</b>                | <b>Planococcaceae</b>            | <b>Planococcaceae_unclassified</b>    |
| <b>Otu0453</b> | <b>2</b> | <b>99.1</b> | <b>Bacteria_unclassified</b> | <b>Bacteria_unclassified</b> | <b>Bacteria_unclassified</b>     | <b>Bacteria_unclassified</b>     | <b>Bacteria_unclassified</b>          |
| Otu0491        | 2        | 91.1        | Actinobacteria               | Actinobacteria_unclassified  | Actinobacteria_unclassified      | Actinobacteria_unclassified      | Actinobacteria_unclassified           |
| <b>Otu0493</b> | <b>2</b> | <b>99.1</b> | <b>Proteobacteria</b>        | <b>Betaproteobacteria</b>    | <b>Burkholderiales</b>           | <b>Oxalobacteraceae</b>          | <b>Oxalobacteraceae_unclassified</b>  |
| Otu0494        | 2        | 91.2        | Actinobacteria               | Acidimicrobiia               | Acidimicrobiales                 | Acidimicrobiales_unclassified    | Acidimicrobiales_unclassified         |
| Otu0517        | 1        | 90.4        | Bacteroidetes                | Sphingobacteriia             | Sphingobacteriales               | Sphingobacteriaceae              | Mucilagibacter                        |
| <b>Otu0563</b> | <b>1</b> | <b>98.1</b> | <b>Proteobacteria</b>        | <b>Gammaproteobacteria</b>   | <b>Pseudomonadales</b>           | <b>Pseudomonadaceae</b>          | <b>Pseudomonas</b>                    |
| <b>Otu0575</b> | <b>1</b> | <b>99</b>   | <b>Firmicutes</b>            | <b>Bacilli</b>               | <b>Bacillales</b>                | <b>Paenibacillaceae</b>          | <b>Paenibacillus</b>                  |
| Otu0584        | 1        | 91.8        | Bacteria_unclassified        | Bacteria_unclassified        | Bacteria_unclassified            | Bacteria_unclassified            | Bacteria_unclassified                 |
| <b>Otu0589</b> | <b>1</b> | <b>98.1</b> | <b>Proteobacteria</b>        | <b>Betaproteobacteria</b>    | <b>Burkholderiales</b>           | <b>Oxalobacteraceae</b>          | <b>Oxalobacteraceae_unclassified</b>  |
| Otu0590        | 1        | 93.6        | Actinobacteria               | Actinobacteria               | Actinobacteria_unclassified      | Actinobacteria_unclassified      | Actinobacteria_unclassified           |
| Otu0595        | 1        | 95.6        | Actinobacteria               | Actinobacteria               | Micrococcales                    | Micrococcaceae                   | Micrococcaceae_unclassified           |
| Otu0609        | 1        | 91.4        | Proteobacteria               | Betaproteobacteria           | Betaproteobacteria_unclassified  | Betaproteobacteria_unclassified  | Betaproteobacteria_unclassified       |
| Otu0614        | 1        | 94.4        | Actinobacteria               | Actinobacteria               | Streptosporangiales              | Thermomonosporaceae              | Thermomonosporaceae_unclassified      |
| <b>Otu0620</b> | <b>1</b> | <b>97.4</b> | <b>Bacteria_unclassified</b> | <b>Bacteria_unclassified</b> | <b>Bacteria_unclassified</b>     | <b>Bacteria_unclassified</b>     | <b>Bacteria_unclassified</b>          |
| Otu0644        | 1        | 93.8        | Actinobacteria               | Acidimicrobiia               | Acidimicrobiales                 | uncultured                       | uncultured_ge                         |
| Otu0652        | 1        | 91.5        | Proteobacteria               | Betaproteobacteria           | Betaproteobacteria_unclassified  | Betaproteobacteria_unclassified  | Betaproteobacteria_unclassified       |
| Otu0670        | 1        | 95.2        | Bacteria_unclassified        | Bacteria_unclassified        | Bacteria_unclassified            | Bacteria_unclassified            | Bacteria_unclassified                 |
| Otu0681        | 1        | 91.7        | Actinobacteria               | Actinobacteria               | Corynebacteriales                | Corynebacteriales_unclassified   | Corynebacteriales_unclassified        |
| Otu0685        | 1        | 92.4        | Actinobacteria               | Thermoleophilia              | Gaiellales                       | uncultured                       | uncultured_ge                         |
| Otu0712        | 1        | 90.4        | Proteobacteria               | Alphaproteobacteria          | Alphaproteobacteria_unclassified | Alphaproteobacteria_unclassified | Alphaproteobacteria_unclassified      |
| Otu0720        | 1        | 91.7        | Actinobacteria               | Actinobacteria               | Actinobacteria_unclassified      | Actinobacteria_unclassified      | Actinobacteria_unclassified           |
| Otu0728        | 1        | 92.7        | Actinobacteria               | Actinobacteria               | Frankiales                       | Acidothermaceae                  | Acidothermus                          |
| Otu0730        | 1        | 94.6        | Proteobacteria               | Betaproteobacteria           | Burkholderiales                  | Burkholderiales_unclassified     | Burkholderiales_unclassified          |
| <b>Otu0751</b> | <b>1</b> | <b>98</b>   | <b>Firmicutes</b>            | <b>Bacilli</b>               | <b>Bacillales</b>                | <b>Paenibacillaceae</b>          | <b>Paenibacillaceae_unclassified</b>  |
| Otu0759        | 1        | 94.4        | Firmicutes                   | Bacilli                      | Lactobacillales                  | Lactobacillales_unclassified     | Lactobacillales_unclassified          |
| Otu0769        | 1        | 92.3        | Bacteroidetes                | Sphingobacteriia             | Sphingobacteriales               | Sphingobacteriaceae              | Sphingobacteriaceae_unclassified      |
| Otu0772        | 1        | 94.6        | Proteobacteria               | Betaproteobacteria           | Burkholderiales                  | Comamonadaceae                   | Comamonadaceae_unclassified           |
| <b>Otu0776</b> | <b>1</b> | <b>99</b>   | <b>Firmicutes</b>            | <b>Bacilli</b>               | <b>Bacillales</b>                | <b>Paenibacillaceae</b>          | <b>Paenibacillus</b>                  |
| Otu0822        | 1        | 96.7        | Firmicutes                   | Bacilli                      | Bacillales                       | Bacillales_unclassified          | Bacillales_unclassified               |
| <b>Otu0829</b> | <b>1</b> | <b>99.1</b> | <b>Firmicutes</b>            | <b>Bacilli</b>               | <b>Bacillales</b>                | <b>Paenibacillaceae</b>          | <b>Paenibacillus</b>                  |
| Otu0831        | 1        | 92          | Actinobacteria               | Acidimicrobiia               | Acidimicrobiales                 | Acidimicrobiales_unclassified    | Acidimicrobiales_unclassified         |
| <b>Otu0866</b> | <b>1</b> | <b>98.1</b> | <b>Proteobacteria</b>        | <b>Alphaproteobacteria</b>   | <b>Rhizobiales</b>               | <b>Rhizobiaceae</b>              | <b>Rhizobium</b>                      |
